# Supplementary material
Source: Hindawi journal article supplement (doi:10.1155/2011/926597)
Supplement: f1 [file 926597.f1.pdf]

Supplementary Table 1. Vascular disease and its association with AD+P

| Variable                                             | Psychosis Status |              |                          | Total N (%) | $\chi^2$ | df | p value |
|------------------------------------------------------|------------------|--------------|--------------------------|-------------|----------|----|---------|
|                                                      | Never N (%)      | Single N (%) | Multiple/Recurrent N (%) |             |          |    |         |
| <b>History of Diabetes</b>                           |                  |              |                          |             | 6.935    | 2  | 0.031   |
| Absent                                               | 1067 (88.5)      | 356 (88.1)   | 226 (82.8)               | 1649 (87.6) |          |    |         |
| Present                                              | 138 (11.5)       | 48 (11.9)    | 47 (17.2)                | 233 (12.4)  |          |    |         |
| <b>History of Hypertension</b>                       |                  |              |                          |             | 6.414    | 2  | 0.04    |
| Absent                                               | 629 (41.7)       | 186 (37.9)   | 107 (34.6)               | 922 (39.9)  |          |    |         |
| Present                                              | 880 (58.3)       | 305 (62.1)   | 202 (65.4)               | 1387 (60.1) |          |    |         |
| <b>History of stroke</b>                             |                  |              |                          |             | 2.776    | 2  | 0.25    |
| Absent                                               | 1369 (90.7)      | 451 (91.9)   | 273 (88.3)               | 2093 (90.6) |          |    |         |
| Present                                              | 140 (9.3)        | 40 (8.1)     | 36 (11.7)                | 216 (9.4)   |          |    |         |
| <b>Focal neurological symptoms</b>                   |                  |              |                          |             | 0.515    | 2  | 0.773   |
| Absent                                               | 1407 (93.2)      | 462 (94.1)   | 290 (93.9)               | 2159 (93.5) |          |    |         |
| present                                              | 102 (6.8)        | 29 (5.9)     | 19 (6.1)                 | 150 (6.5)   |          |    |         |
| <b>Focal neurological signs</b>                      |                  |              |                          |             | 2.179    | 2  | 0.336   |
| Absent                                               | 1355 (89.8)      | 448 (91.2)   | 272 (88.0)               | 2075 (89.9) |          |    |         |
| Present                                              | 154 (10.2)       | 43 (8.8)     | 37 (12.0)                | 234 (10.1)  |          |    |         |
| <b>CVD impacts cognition<sup>a</sup></b>             |                  |              |                          |             | 0.458    | 2  | 0.796   |
| No                                                   | 664 (88.2)       | 194 (89.8)   | 157 (88.2)               | 1015 (88.5) |          |    |         |
| Yes                                                  | 89 (11.8)        | 22 (10.2)    | 21 (11.8)                | 132 (11.5)  |          |    |         |
| <b>Stroke impacts cognition<sup>b</sup></b>          |                  |              |                          |             | 0.614    | 2  | 0.736   |
| No                                                   | 294 (95.5)       | 91 (95.8)    | 76 (97.4)                | 461 (95.8)  |          |    |         |
| yes                                                  | 14 (4.5)         | 4 (4.2)      | 2 (2.6)                  | 20 (4.2)    |          |    |         |
| <b>CVD imaging evidence on cognition<sup>c</sup></b> |                  |              |                          |             | 2.823    | 2  | 0.244   |
| No                                                   | 528 (89.2)       | 160 (90.4)   | 110 (84.6)               | 798 (88.8)  |          |    |         |
| yes                                                  | 64 (10.8)        | 17 (9.6)     | 20 (15.4)                | 101 (11.2)  |          |    |         |

|                                           |           |           |           |           |       |   |       |
|-------------------------------------------|-----------|-----------|-----------|-----------|-------|---|-------|
| <b>Single infarct<sup>d</sup></b>         |           |           |           |           | 0.453 | 2 | 0.797 |
| No                                        | 43 (67.2) | 12 (70.6) | 15 (75.0) | 70 (69.3) |       |   |       |
| Yes                                       | 21 (32.8) | 5 (29.4)  | 5 (25.0)  | 31 (30.7) |       |   |       |
| <b>Multiple infarcts<sup>e</sup></b>      |           |           |           |           |       |   |       |
| No                                        | 46 (71.9) | 13 (76.5) | 15 (75.0) | 74 (73.3) | 0.183 | 2 | 0.913 |
| yes                                       | 18 (28.1) | 4 (23.5)  | 5 (25.0)  | 27 (26.7) |       |   |       |
| <b>Extensive white matter<sup>f</sup></b> |           |           |           |           |       |   |       |
| No                                        | 38 (59.4) | 7 (41.2)  | 8 (40.0)  | 53 (52.5) | 3.340 | 2 | 0.188 |
| Yes                                       | 26 (40.6) | 10 (58.8) | 12 (60.0) | 48 (47.5) |       |   |       |
| <b>Other imaging evidence<sup>g</sup></b> |           |           |           |           |       |   |       |
| No                                        | 45 (70.3) | 12 (70.6) | 16 (80.0) | 73 (72.3) | 0.743 | 2 | 0.690 |
| Yes                                       | 19 (29.7) | 5 (29.4)  | 4 (20.0)  | 28 (27.7) |       |   |       |

Abbreviations: AD+P, Alzheimer Disease plus psychosis; CVD, Cerebral vascular disease

UDS definitions are as follows: <sup>a</sup>: CVD is contributing to the cognitive impairment

<sup>b</sup>: there is a temporal relationship between stroke and onset of cognitive impairment

<sup>c</sup>: there is imaging evidence which supports that CVD is contributing to the cognitive impairment

<sup>d</sup>: imaging evidence exists of a single infarct

<sup>e</sup>: imaging evidence exists of multiple infarcts

<sup>f</sup>: imaging evidence exists of extensive white matter hyperintensity

<sup>g</sup>: other imaging evidence exists

Supplementary Table 2. Vascular disease and its association with AD+P with Never Psychotic (AD-P) cases restricted to CDR<sub>sbc</sub> ≥ 1

| Variable                                 | Psychosis Status |              |                          | Total N (%) | $\chi^2$ | df | p value |
|------------------------------------------|------------------|--------------|--------------------------|-------------|----------|----|---------|
|                                          | Never N (%)      | Single N (%) | Multiple/Recurrent N (%) |             |          |    |         |
| <b>History of Diabetes</b>               |                  |              |                          |             | 8.391    | 2  | 0.015   |
| Absent                                   | 848 (89.3)       | 356 (88.1)   | 226 (82.8)               | 1430 (87.9) |          |    |         |
| Present                                  | 102 (10.7)       | 48 (11.9)    | 47 (17.2)                | 197 (12.1)  |          |    |         |
| <b>History of Hypertension</b>           |                  |              |                          |             | 5.504    | 2  | 0.064   |
| Absent                                   | 471 (41.5)       | 186 (37.9)   | 107 (34.6)               | 764 (39.5)  |          |    |         |
| Present                                  | 664 (58.5)       | 305 (62.1)   | 202 (65.4)               | 1171 (60.5) |          |    |         |
| <b>History of stroke</b>                 |                  |              |                          |             | 2.699    | 2  | 0.259   |
| Absent                                   | 1026 (90.4)      | 451 (91.9)   | 273 (88.3)               | 1750 (90.4) |          |    |         |
| Present                                  | 109 (9.6)        | 40 (8.1)     | 36 (11.7)                | 185 (9.6)   |          |    |         |
| <b>Focal symptoms</b>                    |                  |              |                          |             | 0.496    | 2  | 0.78    |
| Absent                                   | 1058 (93.2)      | 462 (94.1)   | 290 (93.9)               | 1810 (93.5) |          |    |         |
| Present                                  | 77 (6.8)         | 29 (5.9)     | 19 (6.1)                 | 125 (6.5)   |          |    |         |
| <b>Focal signs</b>                       |                  |              |                          |             | 2.180    | 2  | 0.336   |
| Absent                                   | 1019 (89.8)      | 448 (91.2)   | 272 (88.0)               | 1739 (89.9) |          |    |         |
| Present                                  | 116 (10.2)       | 43 (8.8)     | 37 (12.0)                | 196 (10.1)  |          |    |         |
| <b>CVD impacts cognition</b>             |                  |              |                          |             | 0.504    | 2  | 0.777   |
| No                                       | 485 (88.0)       | 194 (89.8)   | 157 (88.2)               | 836 (88.5)  |          |    |         |
| Yes                                      | 66 (12.0)        | 22 (10.2)    | 21 (11.8)                | 109 (11.5)  |          |    |         |
| <b>Stroke impacts cognition</b>          |                  |              |                          |             | 0.830    | 2  | .066    |
| No                                       | 209 (95.0)       | 91 (95.8)    | 76 (97.4)                | 376 (95.7)  |          |    |         |
| Yes                                      | 11 (5.0)         | 4 (4.2)      | 2 (2.6)                  | 17 (4.3)    |          |    |         |
| <b>CVD imaging evidence on cognition</b> |                  |              |                          |             | 2.574    | 2  | 0.276   |
| No                                       | 388 (88.8)       | 160 (90.4)   | 110 (84.6)               | 658 (88.4)  |          |    |         |
| Yes                                      | 49 (11.2)        | 17 (9.6)     | 20 (15.4)                | 86          |          |    |         |

|                               |           |           |           |           |       |   |       |
|-------------------------------|-----------|-----------|-----------|-----------|-------|---|-------|
|                               |           |           |           | (11.6)    |       |   |       |
| <b>Single infarct</b>         |           |           |           |           | 0.094 | 2 | 0.954 |
| No                            | 36 (73.5) | 12 (70.6) | 15 (75.0) | 63 (73.3) |       |   |       |
| Yes                           | 13 (26.5) | 5 (29.4)  | 5 (25.0)  | 23 (26.7) |       |   |       |
| <b>Multiple infarcts</b>      |           |           |           |           | 0.719 | 2 | 0.698 |
| No                            | 33 (67.3) | 13 (76.5) | 15 (75.0) | 61 (70.9) |       |   |       |
| Yes                           | 16 (32.7) | 4 (23.5)  | 5 (25.0)  | 25 (29.1) |       |   |       |
| <b>Extensive white matter</b> |           |           |           |           | 1.330 | 2 | 0.514 |
| No                            | 26 (53.1) | 7 (41.2)  | 8 (40.0)  | 41 (47.7) |       |   |       |
| Yes                           | 23 (46.9) | 10 (58.8) | 12 (60.0) | 45 (52.3) |       |   |       |
| <b>Other imaging evidence</b> |           |           |           |           | 0.498 | 2 | 0.780 |
| No                            | 38 (77.6) | 12 (70.6) | 16 (80.0) | 66 (76.7) |       |   |       |
| Yes                           | 11 (22.4) | 5 (29.4)  | 4 (20.0)  | 20 (23.3) |       |   |       |

Abbreviations: AD+P, Alzheimer Disease plus psychosis; CVD, Cerebral vascular disease

UDS definitions are as follows: <sup>a</sup>: CVD is contributing to the cognitive impairment

<sup>b</sup>: there is a temporal relationship between stroke and onset of cognitive impairment

<sup>c</sup>: there is imaging evidence which supports that CVD is contributing to the cognitive impairment

<sup>d</sup>: imaging evidence exists of a single infarct

<sup>e</sup>: imaging evidence exists of multiple infarcts

<sup>f</sup>: imaging evidence exists of extensive white matter hyperintensity

<sup>g</sup>: other imaging evidence exists
